# Supplementary material for: Effect of Guarana (Paullinia cupana) on Cognitive Performance: A Systematic Review and Meta-Analysis
Source: Nutrients. 2023 Jan 14;15(2):434. doi: 10.3390/nu15020434 (PMC9865053; doi:10.3390/nu15020434)
Supplement: Supplementary file 1 [file nutrients-15-00434-s001.zip › nutrients-2132425-Table S1 .pdf]

**Table S1: Summary of Studies Assessing Acute Ingestion**

| Reference               | Subjects<br>N<br>(#female)<br>Age (y) | Guarana Dose<br>(Caffeine<br>content)<br>#Other<br>Treatment                    | Time of<br>Testing After<br>Ingestion<br>(min) | Guarana<br>Source                           | Cognitive Tests                                                                                                                                                        | Parameter Measured                                                                                                                                                                                                                                                                                           | Effects (p<0.05) G vs. P                                                                                                                                                                   | Effects (p<0.05) of G<br>vs. Other Treatment |
|-------------------------|---------------------------------------|---------------------------------------------------------------------------------|------------------------------------------------|---------------------------------------------|------------------------------------------------------------------------------------------------------------------------------------------------------------------------|--------------------------------------------------------------------------------------------------------------------------------------------------------------------------------------------------------------------------------------------------------------------------------------------------------------|--------------------------------------------------------------------------------------------------------------------------------------------------------------------------------------------|----------------------------------------------|
| Galduróz<br>1994 * [16] | 30(24F)<br><br>R = 24-35              | 500 mg Capsule<br>(CAF = 2.1%)<br><br>#- CAF (12.5 mg)                          | 60                                             | NR                                          | Digit Span<br>Free Recall<br>Digit Symbol<br>Cancellation                                                                                                              | Immediate Memory (SC)<br>Short Term Memory (SC)<br>Attention (SC)<br>Attention (SC)                                                                                                                                                                                                                          | ND<br>ND<br>ND<br>ND                                                                                                                                                                       | ND for G vs. CAF- all<br>tasks               |
| Haskell 2007<br>[18]    | 26 (NR)<br><br>X = 21.4               | 37.5, 75, 150, 300<br>mg Capsule<br>(CAF = 11-12%)                              | 60, 180, 360                                   | PC-102,<br>Pharmaton,<br>SA                 | Computerized Assessment<br>Battery                                                                                                                                     | Attention (RT)<br>Attention (%)<br>Memory (RT)<br>Secondary Memory (%)<br>Working Memory (%)                                                                                                                                                                                                                 | ND<br>ND<br>ND<br>+ 37.5mg(MT) 75mg(MT)<br>ND                                                                                                                                              |                                              |
| Kennedy<br>2004 [17]    | 28 (19F)<br><br>X = 21.4              | 75 mg Capsule<br>(CAF = 11-13%)<br><br>#-G (75mg)<br>+ginseng,<br><br>#-Ginseng | 60, 150, 240,<br>360                           | Dried<br>Ethanollic<br>Extract              | Computerized Assessment<br>Battery<br><br><br><br><br>Logical Reasoning<br><br>Sentence Verification<br><br>Serial Threes Subtraction<br><br>Serial Sevens Subtraction | Attention (RT)<br>Attention (%)<br>Memory (RT)<br>Secondary Memory (SC)<br>Working Memory (SC)<br>Reasoning (RT)<br>Reasoning (%)<br>Verification (RT)<br>Verification (%)<br>Attention/Working Memory (SC)<br>Attention/Working Memory (%)<br>Attention/Working Memory (SC)<br>Attention/Working Memory (%) | + G(60,240,360) GM(150, 240,360)<br>ND<br>+ GM(240, 360)<br>+ G(150)<br>ND<br>ND<br>ND<br>+ G(2.5,4,6) GM(2.5)<br>ND<br>+ G(2.5,4) GM(4,6)<br>+ G(1,2.5,4,6) GM(1,6)<br>- G(4) + GM(1,2,5) |                                              |
| Kennedy<br>2008 * [19]  | 130 (70F)<br><br>X = 21.0             | 222.2 mg in 200<br>ml water<br>(CAF = 40 mg)                                    | 30, 40, 50, 60,<br>70, 80                      | Berocca<br>Boost<br>(Vitamins/<br>Minerals) | Serial Threes Subtraction<br><br>Serial Sevens Subtraction<br><br>Rapid Visual Information<br>Processing                                                               | Attention/Working Memory (SC)<br>Attention/Working Memory (%)<br>Attention/Working Memory (SC)<br>Attention/Working Memory (%)<br>Visual Processing (RT)<br>Visual Processing (%)                                                                                                                            | ND<br>ND<br>ND<br>ND<br>+ (30,40,50,60,80)<br>+ (30,40,50,60,70,80)                                                                                                                        |                                              |



|  |  |  |  |  |                     |                     |        |  |
|--|--|--|--|--|---------------------|---------------------|--------|--|
|  |  |  |  |  | Delayed Word Recall | Working Memory (RT) | ND     |  |
|  |  |  |  |  | Word Recognition    | Working Memory (%)  | ND     |  |
|  |  |  |  |  | Picture Recognition | Visual Memory (RT)  | + (CB) |  |
|  |  |  |  |  |                     | Visual Memory (%)   | ND     |  |

**Supplementary Table S1. Summary of Studies Assessing Acute Ingestion of Guarana (n = 9):** Description of studies meeting the inclusion criterion when examining effects of acute guarana ingestion on cognitive performance compared to a placebo or control condition (may contain other substances but otherwise no guarana).

Symbols: + = Significantly in favor of Guarana (Guarana had faster response time or higher accuracy), - = Significantly in favor of placebo X = Mean, \* = Independent Group Design, Abbreviations: F = Females R = Range, NR = Data Not Reported, G = Guarana Ingestion, P = Placebo, CAF = Caffeine, GM = Guarana Ingestion Mixed with Other Nutrients, MT = Mean of All Time Points, CB = Change From Baseline Condition, AD = All Doses, AE = After Exercise, % = Accuracy, RT = Response Time, FA = False Alarms Generated, SC = Score, ND = No Significant Difference
