# Supplementary material for: Effect of Guarana (Paullinia cupana) on Cognitive Performance: A Systematic Review and Meta-Analysis
Source: Nutrients. 2023 Jan 14;15(2):434. doi: 10.3390/nu15020434 (PMC9865053; doi:10.3390/nu15020434)
Supplement: Supplementary file 1 [file nutrients-15-00434-s001.zip › PEDro Table S2 Final.pdf]

**Table S2. PEDro score: Experimental Studies Included in Meta-Analysis.**

[illegible]

**Supplementary Table S2.** The PEDro quality scores, for all studies included in the meta-analysis, were  $\geq 7$ . Only one study had a score below the maximum score of 11.
